# Supplementary material for: Lactate Reprograms Energy and Lipid Metabolism in Glucose-Deprived Oxidative Glioma Stem Cells
Source: Metabolites. 2021 May 18;11(5):325. doi: 10.3390/metabo11050325 (PMC8158503; doi:10.3390/metabo11050325)
Supplement: Supplementary file 1 [file metabolites-11-00325-s001.zip › Table S1-LC-TOFMS data for the analyzed metabolites.xlsx]

## Sheet: Metabolites (Relative area)
Supplementary data: LC-TOFMS
				Relative area
Compound name	HMDB ID	m/z	MT/RT	ULGM				ULGM+L
				ULGM1	ULGM2	ULGM3	ULGM4	ULGM+L1	ULGM+L2	ULGML+L3	ULGM+L4
1,2-Dipalmitoyl-glycero-3-phosphoethanolamine	HMDB0008923	692.527	16.1837	0.025276	0.0339156	0.0317049	0.0258766	0.0371363	0.0339449	0.0316801	0.0274829
1,2-Dipalmitoyl-glycero-3-phosphoglycerol	HMDB0010570	721.502	17.8206	0.000779414	0.00111198	0.000730267	0.000798676	0.000577256	N.D.	0.000365722	N.D.
1,2-Distearoyl-glycero-3-phosphocholine	HMDB0008036	790.627	16.6631	0.22792	0.24489	0.25804	0.240685	0.839834	0.868419	0.67173	0.575523
1-Myristoyl-glycero-3-phosphocholine-1	HMDB0010379	468.31	11.7266	0.0117157	0.0109511	0.0100117	0.011774	0.00794049	0.00905636	0.00808509	0.00424365
1-Myristoyl-glycero-3-phosphocholine-2	HMDB0010379	468.312	11.8996	0.0179016	0.0193521	0.0217735	0.0207013	0.0175965	0.0172349	0.0152289	0.0136907
1-Oleoyl-glycero-3-phosphocholine-1	HMDB0010385	522.359	12.7224	0.0817862	0.081764	0.0716204	0.0940576	0.0903306	0.0914195	0.0777519	0.0431754
1-Oleoyl-glycero-3-phosphocholine-2	HMDB0010385	522.359	12.8668	0.0898875	0.0955828	0.0957581	0.0902449	0.0996483	0.0884424	0.0890624	0.0603532
1-Palmitoyl-glycero-3-phosphocholine-1	HMDB0010382	496.343	12.5466	0.0573582	0.0573921	0.0501497	0.0644932	0.048832	0.0440197	0.0413028	0.0267926
1-Palmitoyl-glycero-3-phosphocholine-2	HMDB0010382	496.343	12.7131	0.161501	0.174636	0.172888	0.179966	0.213827	0.22719	0.204535	0.14314
1-Palmitoyl-glycero-3-phosphoethanolamine-1 LPE(16:0)-1	HMDB0011503	454.296	12.6271	0.00280092	N.D.	0.00240685	N.D.	0.00286661	0.00351914	0.00334735	0.00268043
1-Palmitoyl-glycero-3-phosphoethanolamine-2 LPE(16:0)-2	HMDB0011503	454.294	12.7752	0.00376292	0.00401907	0.0042664	0.003163	0.00594825	0.00490774	0.0038693	0.00547274
1-Stearoyl-glycero-3-phosphocholine-1	HMDB0010384	524.375	13.3382	0.00276053	0.00247114	0.00377993	0.0023296	0.00256303	0.00379717	0.00231831	0.00321623
1-Stearoyl-glycero-3-phosphocholine-2	HMDB0010384	524.374	13.4906	0.039647	0.0395894	0.0378747	0.0367629	0.0449424	0.0503785	0.0488734	0.0319606
2-Arachidonoylglycerol	HMDB0004666	379.286	13.1241	0.0165026	0.01775	0.0150942	0.0135462	0.00530947	0.00786613	N.D.	N.D.
5α-Cholestan-3-one	HMDB0000871	387.371	15.7543	0.00702393	0.00680916	0.00670001	0.00577185	0.00671353	0.00694925	0.00793787	0.00584661
AC(12:0)		344.28	9.62832	N.D.	N.D.	N.D.	0.00342052	0.00517666	N.D.	N.D.	0.00539472
AC(14:0)		372.313	10.3919	N.D.	N.D.	0.00182429	N.D.	0.0079152	0.00596208	0.00525226	0.00829153
AC(14:1)-1		370.297	9.89478	N.D.	N.D.	N.D.	N.D.	N.D.	N.D.	N.D.	0.00364162
AC(14:1)-2		370.297	9.9796	N.D.	N.D.	N.D.	N.D.	0.0027164	N.D.	N.D.	0.00372258
AC(16:1)		398.33	10.6086	0.00589894	0.00427511	0.00645312	0.00679322	0.0119329	0.00774742	0.00865463	0.0139409
AC(18:0)		428.372	11.7922	N.D.	N.D.	N.D.	N.D.	0.00959753	N.D.	0.00684192	N.D.
AC(18:1)		426.359	11.2592	0.00520521	0.00608347	0.00519436	0.00606196	0.0254469	0.0207868	0.0144378	0.027555
AC(20:1)		454.388	11.8813	N.D.	N.D.	N.D.	N.D.	0.00234325	0.00220395	N.D.	0.00121731
Arachidic acid	HMDB0002212	311.294	15.4334	0.00021994	N.D.	N.D.	N.D.	N.D.	N.D.	N.D.	N.D.
Arachidonic acid	HMDB0001043	303.233	13.7613	N.D.	0.000284563	N.D.	0.000280706	N.D.	N.D.	N.D.	N.D.
Behenic acid	HMDB0000944	339.329	15.905	0.000760162	0.0010607	0.000708652	0.000963854	0.000643089	0.000535782	0.000582275	N.D.
Cholesterol	HMDB0000067	369.355	15.7543	0.594891	0.633442	0.548761	0.492042	0.580309	0.559237	0.533667	0.465554
Cholesterol sulfate	HMDB0000653	465.305	16.5865	N.D.	N.D.	0.000364361	0.000773852	N.D.	N.D.	N.D.	N.D.
Coenzyme Q10	HMDB0001072	863.691	18.7134	0.00659124	0.00687646	0.00585597	0.00511121	0.00571583	0.00520139	0.00424107	0.00452185
Cycloartenol Lanosterol	HMDB0036591 HMDB0001251	409.388	15.9357	N.D.	N.D.	N.D.	N.D.	N.D.	N.D.	N.D.	N.D.
Deoxycholic acid	HMDB0000626	391.282	11.7431	N.D.	N.D.	N.D.	0.000225806	N.D.	N.D.	N.D.	N.D.
Desmosterol-1 7-Dehydrocholesterol-1	HMDB0002719 HMDB0000032	367.334	15.4331	N.D.	N.D.	N.D.	N.D.	N.D.	N.D.	N.D.	N.D.
Desmosterol-2 7-Dehydrocholesterol-2	HMDB0002719 HMDB0000032	367.344	15.3499	0.00398071	0.00483254	0.0035975	0.00330534	0.00722266	0.00679305	0.00601066	0.00463667
Ethyl arachidonate	HMDB0062725	333.28	14.6703	0.0038985	N.D.	0.00185956	0.00314779	N.D.	N.D.	N.D.	N.D.
FA(14:3)		221.154	11.9622	N.D.	N.D.	0.000299003	N.D.	N.D.	0.000355396	N.D.	N.D.
Glucosylceramide(d18:1/24:1)		810.682	16.8896	0.0130008	0.0137383	0.0144472	0.0122456	0.0310932	0.026221	0.0195473	0.0198567
Lactosylceramide(d18:1/24:1)		972.729	16.707	0.00304899	0.0037645	0.00287265	0.00314018	0.00208553	N.D.	0.00200454	0.00154997
LPC(24:0)	HMDB0010405	608.47	15.4371	N.D.	0.00142357	N.D.	N.D.	0.00365876	0.00278501	0.00362394	0.00365634
LPE(18:1)-1		478.296	12.8136	0.00351961	0.00374997	0.00319845	0.00402298	0.00483261	0.00433942	0.00408226	0.00259014
LPE(18:1)-2		478.296	12.9386	0.00408609	0.00497828	0.00456738	0.00442781	0.00636383	0.00550894	0.00568914	0.0041861
LPG(18:1)-1		509.291	15.0702	0.000530305	0.000768632	0.000607269	0.000663097	0.00113927	0.00149446	0.00123366	0.000567711
LPG(18:1)-2		509.289	15.1821	0.000378623	N.D.	0.000381344	N.D.	0.000809499	0.000718558	0.000590339	0.000568827
LPS(18:0)		524.298	15.4389	N.D.	0.000494076	0.000876423	N.D.	N.D.	N.D.	N.D.	N.D.
Myristic acid	HMDB0000806	227.202	13.4601	N.D.	N.D.	N.D.	N.D.	N.D.	0.000355994	N.D.	N.D.
Oleoyl ethanolamide AEA(18:1)	HMDB0002088	326.305	13.442	N.D.	N.D.	N.D.	0.00664979	0.0105415	0.00792861	N.D.	0.0080884
Palmitic acid	HMDB0000220	255.234	14.2248	0.00263227	0.00321275	0.00244606	0.00308586	0.00233219	0.00254452	0.00239937	0.00236686
Palmitoleic acid	HMDB0003229	253.219	13.6993	N.D.	N.D.	N.D.	0.00023249	N.D.	N.D.	N.D.	N.D.
Palmitoylcarnitine	HMDB0000222	400.345	11.1023	N.D.	0.00365477	0.00306845	0.00316083	0.0232317	0.0148263	0.0131292	0.0261685
Palmitoylethanolamide	HMDB0002100	300.291	13.2939	0.00845179	N.D.	0.00637285	N.D.	N.D.	N.D.	N.D.	N.D.
Sphinganine	HMDB0000269	302.308	10.7502	0.00839121	0.00809374	0.00555557	0.00797323	0.0131124	0.0168584	0.0103172	0.00849025
Sphingomyelin(d18:1/16:0)	HMDB0010169	703.58	15.7987	1.63916	1.72579	1.7037	1.61398	1.74688	1.78425	1.60861	1.31235
Sphingomyelin(d18:1/18:0)	HMDB0001348	731.607	16.2967	0.135141	0.146826	0.135419	0.120859	0.135793	0.14468	0.129883	0.104848
Sphingosine	HMDB0000252	300.292	10.578	0.027702	0.0302067	0.0258563	0.0248455	0.0414892	0.0359287	0.0332846	0.0226976
Stearic acid	HMDB0000827	283.266	14.8841	0.0057651	0.00536479	0.00437131	0.00537829	0.00371346	0.00393743	0.00412719	0.00373059
Stearoyl ethanolamide	HMDB0013078	328.314	14.0598	N.D.	N.D.	0.00384803	N.D.	N.D.	N.D.	N.D.	N.D.
α-Tocopherol	HMDB0001893	431.388	15.9533	0.254012	0.243428	0.19159	0.161034	0.262569	0.235506	0.219245	0.218725
α-Tocopherol acetate	HMDB0034227	490.426	16.2013	0.120197	0.115375	0.108347	0.0794444	0.108833	0.0737536	0.0715836	0.0695191
N.D. = not detected
